# Supplementary material for: Structure-Based Discovery of Novel Chemical Classes of Autotaxin Inhibitors
Source: MDPI journal article supplement (doi:10.3390/ijms21197002), 2020-09-23
Supplement: s1 [file s1]

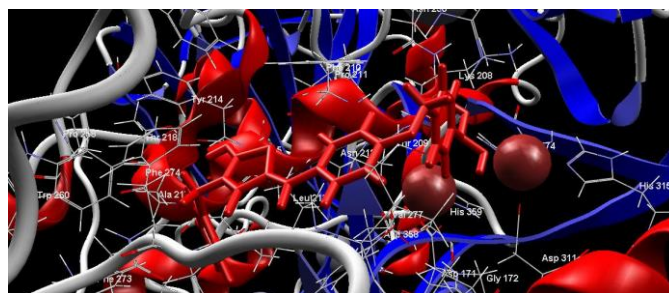

(a) HA-155

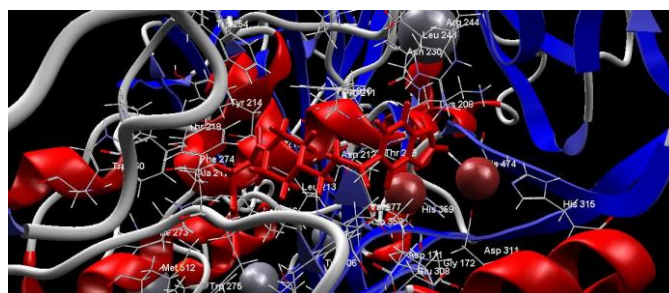

(b) PF8380

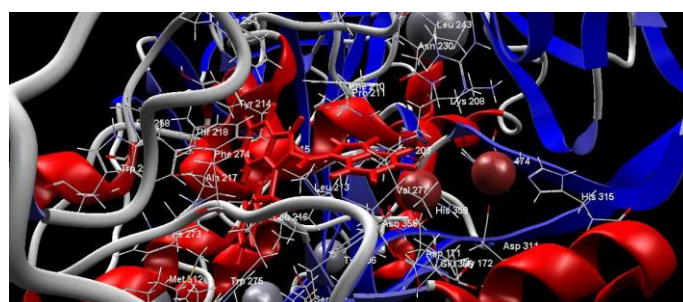

(c) SCR01013

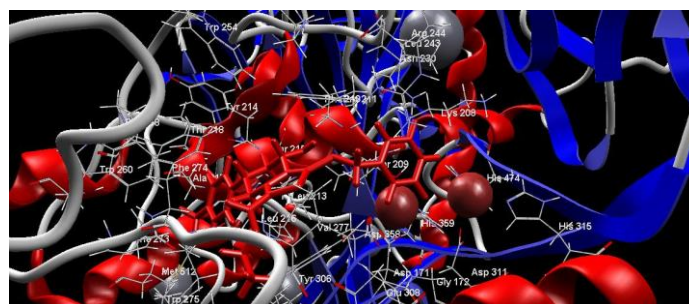

(d) KM03601

**Figure S1.** Docking poses illustrating the lowest-energy conformation of the reference compounds HA-155 and PF8380 (Fig. 1), as well as the initial hits SCR01013 and KM03601 (Table 1) bound to ATX.

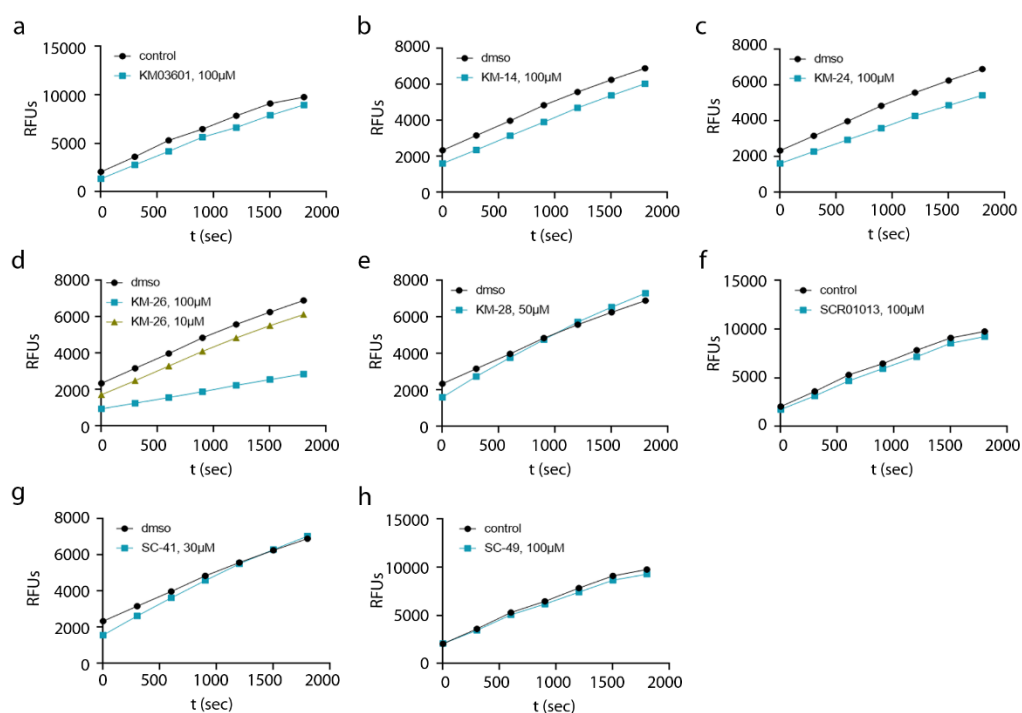

**Figure S2.** Kinetics for the second and third reaction of the Amplex Red Lyso-phospholipase D Assay. All compounds were tested at a final concentration of 100  $\mu$ M apart from KM-28 and SC-41 which were tested at 50  $\mu$ M and 30  $\mu$ M, respectively, due to a lower concentration of their initial stocks.
